# Supplementary material
Source: publisher figshare collection journal article supplement (https://karger.figshare.com/articles/dataset/_/21922554)
Supplement: Supplementary file 2 [file 1]

| Supplementary Table 1: Demographic, clinical and laboratory findings of the patients with ARPKD |        |                  |               |                |                                 |                                                 |                                  |                                                  |                                                                                        |
|-------------------------------------------------------------------------------------------------|--------|------------------|---------------|----------------|---------------------------------|-------------------------------------------------|----------------------------------|--------------------------------------------------|----------------------------------------------------------------------------------------|
| Patient number                                                                                  | Gender | Age at Diagnosis | Consanguinity | Family History | Creatinine at diagnosis (mg/dL) | eGFR at diagnosis (ml/min/1.73 m <sup>2</sup> ) | Creatinine at last visit (mg/dL) | eGFR at last visit (ml/min/1.73 m <sup>2</sup> ) | USG Findings                                                                           |
| PN1556                                                                                          | F      | prenatal         | +             | -              | 0.64                            | 21.25                                           | NA                               | NA /died                                         | Increased renal echogenicity, CM cysts                                                 |
| PN772                                                                                           | M      | 10 years         | -             | -              | 0.58                            | 124                                             | 0.98                             | 69.5                                             | Increased renal echogenicity, Nephrocalcinosis, Medullary sponge kidney, CM cysts      |
| PN778                                                                                           | M      | 7 months         | +             | -              | 0.60                            | 82                                              | 1.41                             | 51.2                                             | Increased renal echogenicity, Nephrocalcinosis, CM cysts, splenomegaly                 |
| PN1483                                                                                          | F      | 11 months        | -             | -              | 0.38                            | 63.5                                            | 0.53                             | 95.7                                             | Increased renal echogenicity, Nephrocalcinosis, CM cysts, increased liver echogenicity |
| PN1540 III <sup>†</sup>                                                                         | F      | 14 years         | +             | +              | 0.69                            | 95.7                                            | 0.83                             | 81                                               | Increased renal echogenicity, CM cysts                                                 |
| PN1540 II2 <sup>†</sup>                                                                         | M      | 2 years          | +             | +              | 0.90                            | 39                                              | 1.34                             | 39.7                                             | Increased renal echogenicity, CM cysts and multiple cysts in the liver                 |
| PN1680*                                                                                         | F      | 12 months        | -             | -              | 1.30                            | 29.8                                            | 1.31                             | 48.2                                             | Increased renal echogenicity, CM cysts, PF, ascites, splenomegaly                      |
| PN1700                                                                                          | M      | 11.5 months      | -             | -              | 0.20                            | 81.6                                            | 0.20                             | 81.6                                             | Renal cortical cysts                                                                   |
| PN1671                                                                                          | M      | prenatal         | -             | -              | 0.63                            | 86.5                                            | 0.78                             | 74                                               | Increased renal echogenicity, renal cortical cysts                                     |
| PN1855                                                                                          | M      | 9 years 3 months | +             | -              | 0.37                            | 147                                             | 0.5                              | 132                                              | Renal cortical cysts                                                                   |
| PN1820                                                                                          | M      | 3 years 9 months | -             | +              | 0.42                            | 105                                             | 0.52                             | 123                                              | Increased renal echogenicity, CM cysts and multiple cysts in the liver                 |
| PN1831                                                                                          | M      | 5 months         | -             | -              | 0.23                            | 122                                             | 0.53                             | 102                                              | Increased renal echogenicity, Medullary sponge kidney, CM cysts                        |
| PN1881                                                                                          | F      | 6 years          | -             | -              | 0.54                            | 116                                             | 0.66                             | 98                                               | Increased renal echogenicity, Medullary sponge kidney, multiple medullary cysts        |
| PN2107*                                                                                         | M      | 7 months         | +             | +              | 1.25                            | 16.5                                            | 0.19                             | 165                                              | Increased renal echogenicity, CM cysts, PF                                             |
| PN2285                                                                                          | F      | 1.5 months       | +             | +              | 0.52                            | 30.7                                            | 4.29                             | 7.6                                              | Increased renal echogenicity, CM cysts, PF, ascites                                    |
| PN2261                                                                                          | M      | 4 months         | +             | +              | 0.26                            | 83.6                                            | 0.26                             | 82                                               | Increased renal echogenicity, CM cysts and liver cysts, PF, dilated bile ducts         |
| PN2040                                                                                          | F      | 15 years         | +             | -              | 0.80                            | 75.88                                           | 1.08                             | 56                                               | Increased renal echogenicity, CM cysts                                                 |
| PN2044                                                                                          | F      | prenatal         | +             | +              | 0.38                            | 27.6                                            | 0.34                             | 65                                               | Increased renal echogenicity, CM cysts and liver cysts, PF, dilated bile ducts         |
| PN1967                                                                                          | F      | prenatal         | +             | -              | 1.12                            | 6.7                                             | NA                               | NA /died                                         | Increased renal echogenicity, CM cysts                                                 |
| PN1963                                                                                          | M      | 10 months        | -             | -              | 0.21                            | 119.8                                           | 0.51                             | 76.7                                             | Increased renal echogenicity, CM cysts, PF, dilated bile ducts, splenomegaly           |
| PN2325                                                                                          | F      | prenatal         | -             | +              | 0.86                            | 14.5                                            | 0.64                             | 19 /died                                         | Increased renal echogenicity, CM cysts                                                 |

CM, corticomedullary; F, female; M, male; NA, not available; PF, periportal fibrosis; USG, ultrasonography

\*: Patients with the renal transplantation

†: PN1540 III and II2 are siblings.

Supplementary Table 2: Genetic characteristics of the patients with ARPKD

| Patient number | <i>PKHD1</i> allele 1<br>Variant (predicted aminoacid change)* | Reference/dbSNP<br>database                              | ClinVar <sup>a</sup> or <i>In silico</i><br>prediction for previously<br>unpublished variations            | Aachen database <sup>b</sup> | <i>PKHD1</i> allele 2<br>Variant (predicted<br>aminoacid change)* | Reference/dbSNP<br>database                                  | ClinVar <sup>a</sup> or <i>In silico</i> prediction for<br>previously unpublished variations         | Aachen database <sup>b</sup> |
|----------------|----------------------------------------------------------------|----------------------------------------------------------|------------------------------------------------------------------------------------------------------------|------------------------------|-------------------------------------------------------------------|--------------------------------------------------------------|------------------------------------------------------------------------------------------------------|------------------------------|
| PN1556         | c.707+1G>A (splice site)                                       | Melchionda (2016) J Hum Genet<br>61: 811 <sup>(1)</sup>  |                                                                                                            | NA                           | c.707+1G>A (splice site)                                          | Melchionda (2016) J Hum<br>Genet 61: 811 <sup>(1)</sup>      |                                                                                                      | NA                           |
| PN772          | Exon 12: c.788_789delCT (p.Ser263fs*22)                        | rs1045491786                                             | ClinVar: Not reported<br>MT: Disease causing                                                               | NA                           | Exon 60: c.10036T>C<br>(p.Cys3346Arg)                             | Rossetti (2003) Kidney Int 64:<br>391 <sup>(2)</sup>         | (-)                                                                                                  | Pathogenic                   |
| PN778          | Exon 58: c.9524A>G (p.Asn3175Ser)                              | Furu (2003) J Am Soc Nephrol<br>14: 2004 <sup>(3)</sup>  | (-)                                                                                                        | Pathogenic                   | Exon 36: c.5785_5790delTCCAGG<br>(p.Ser1929_Arg1930del)           | rs1045491786                                                 | ClinVar: Not reported<br>MT: Disease causing<br>SIFT: Deleterious                                    | NA                           |
| PN1483         | Exon 33: c.5275G>C (p.Gly1759Arg)                              | rs398124488                                              | ClinVar: Uncertain significance<br>MT: Disease causing<br>SIFT: Damaging; PolyPhen-2:<br>Possibly damaging | NA                           | Exon33: c.5365G>T (p.Val1789Phe)                                  | Novel                                                        | ClinVar: Not reported<br>MT: Polymorphism<br>SIFT: Damaging; PolyPhen-2: Possibly damaging           | NA                           |
| PN1540 III     | Exon32: c.4870C>T (p.Arg1624Trp)                               | Onuchic (2002) Am J Hum<br>Genet 70: 1305 <sup>(4)</sup> | (-)                                                                                                        | Pathogenic                   | Exon 58: c.9189C>A (p.Asn3063Lys)                                 | Novel                                                        | ClinVar: Not reported<br>MT: Polymorphism<br>SIFT: Damaging; PolyPhen2: Probably damaging            | NA                           |
| PN1540 II2     | Exon32: c.4870C>T (p.Arg1624Trp)                               | Onuchic (2002) Am J Hum<br>Genet 70: 1305 <sup>(4)</sup> | (-)                                                                                                        | Pathogenic                   | Exon 58: c.9189C>A (p.Asn3063Lys)                                 | Novel                                                        | ClinVar: Not reported<br>MT: Polymorphism<br>SIFT: Damaging; PolyPhen2: Probably damaging            | NA                           |
| PN1680         | Exon 35: c.5735G>A (p.Trp1912*)                                | Novel                                                    | ClinVar: Not reported<br>MT: Disease causing                                                               | NA                           | Exon 33: c.5353T>C (p.Phe1785Leu)                                 | Bergmann (2005) Kidney Int<br>67: 829 <sup>(5)</sup>         | (-)                                                                                                  | Pathogenic                   |
| PN1700         | c.4870C>T (p.Arg1624Trp)                                       | Onuchic (2002) Am J Hum<br>Genet 70: 1305 <sup>(4)</sup> | (-)                                                                                                        | Pathogenic                   | Exon 22: c.2279G>A (p.Arg760His)                                  | Onuchic (2002) Am J Hum<br>Genet 70: 1305 <sup>(4)</sup>     | (-)                                                                                                  | Pathogenic                   |
| PN1671         | Exon 53: c.8315T>C (p.Leu2772Pro)                              | Furu (2003) J Am Soc Nephrol<br>14: 2004 <sup>(3)</sup>  | (-)                                                                                                        | Pathogenic                   | Exon16: c.1397G>A (p.Gly466Glu)                                   | Gunay-Aygun (2010) Mol<br>Genet Metab 99: 160 <sup>(6)</sup> | (-)                                                                                                  | Probably pathogenic          |
| PN1855         | Exon 57: c.8863C>T (p.Arg2955*)                                | Liang (2020) Clin Chim Acta<br>501: 207 <sup>7</sup>     | ClinVar: Pathogenic                                                                                        | NA                           | Exon 32: c.5134G>A (p.Gly1712Arg)                                 | Gunay-Aygun (2010) Mol<br>Genet Metab 99: 160 <sup>(6)</sup> | (-)                                                                                                  | Probably pathogenic          |
| PN1820         | Exon 40: c.6610G>A (p.Val2204Met)                              | rs747645373                                              | ClinVar: Not reported<br>MT: Disease causing<br>SIFT: Damaging<br>PolyPhen2: Probably damaging             | NA                           | Exon 35: c.5735G>A (p.Trp1912*)                                   | Novel                                                        | ClinVar: Not reported<br>MT: Disease causing                                                         | NA                           |
| PN1831         | Exon 50: c.7912T>A (p.Tyr2638Asn)                              | Denamur (2010) Kidney Int 77:<br>350 <sup>(8)</sup>      | (-)                                                                                                        | NA                           | Exon 32: c.5134G>A (p.Gly1712Arg)                                 | Gunay-Aygun (2010) Mol<br>Genet Metab 99: 160 <sup>(6)</sup> | (-)                                                                                                  | Probably pathogenic          |
| PN1881         | c.8441-1G>A (splice site)                                      | Novel                                                    | HSF: Broken WT acceptor site                                                                               | NA                           | Exon 61: c.10658T>C (p.Ile3553Thr)                                | Ward (2002) Nat Genet 30: 259<br><sup>(9)</sup>              | (-)                                                                                                  | Pathogenic                   |
| PN2107         | Exon 59: c.9945delG (p.Met3316fs*2)                            | Novel                                                    | ClinVar: Not reported<br>MT: Disease causing                                                               | NA                           | Exon 14: c.1116C>G (p.Phe372Leu)                                  | Bergmann (2005) Kidney Int<br>67: 829 <sup>(5)</sup>         | (-)                                                                                                  | Pathogenic                   |
| PN2285         | c.602+5G>T (splice site)                                       | Brinkert (2013) Transpl Int 26:<br>640 <sup>(10)</sup>   | (-)                                                                                                        | NA                           | c.602+5G>T (splice site)                                          | Brinkert (2013) Transpl Int 26:<br>640 <sup>(10)</sup>       | (-)                                                                                                  | NA                           |
| PN2261         | Exon 41: c.6771T>G (p.Asn2257Lys)                              | rs1315333212                                             | ClinVar: Uncertain significance<br>SIFT: Damaging, PolyPhen-2:<br>Probably damaging                        | NA                           | Exon 41: c.6771T>G (p.Asn2257Lys)                                 | rs1315333212                                                 | ClinVar: Uncertain significance<br>MT: Polymorphism<br>SIFT: Damaging, PolyPhen-2: Probably damaging | NA                           |
| PN2040         | Exon 61: c.10910G>A (p.Arg3637His)                             | rs371329493                                              | ClinVar: Uncertain significance<br>MT: Polymorphism; SIFT:<br>Tolarated; PolyPhen2: Benign                 | NA                           | Exon 24: c.2539G>A (p.Val847Met)                                  | rs778864835                                                  | ClinVar: Uncertain significance<br>MT: Polymorphism<br>SIFT: Tolarated                               | NA                           |

|        |                                     |                                                                    |                                                                                           |            |                                     |                                                                    | PolyPhen2: Probably damaging                 |            |
|--------|-------------------------------------|--------------------------------------------------------------------|-------------------------------------------------------------------------------------------|------------|-------------------------------------|--------------------------------------------------------------------|----------------------------------------------|------------|
| PN2044 | Exon 14: c.1116C>G (p.Phe372Leu)    | Bergmann (2005) Kidney Int 67: 829 PubMed: 15698423 <sup>(5)</sup> | (-)                                                                                       | Pathogenic | Exon 14: c.1116C>G (p.Phe372Leu)    | Bergmann (2005) Kidney Int 67: 829 PubMed: 15698423 <sup>(5)</sup> | (-)                                          | Pathogenic |
| PN1967 | Exon 59: c.9945delG (p.Met3316fs*2) | Novel                                                              | ClinVar: Not reported<br>MT: Disease causing                                              | NA         | Exon 59: c.9945delG (p.Met3316fs*2) | Novel                                                              | ClinVar: Not reported<br>MT: Disease causing | NA         |
| PN1963 | Exon 61: c.10623C>A (p.Asn3541Lys)  | Novel                                                              | ClinVar: Not reported<br>MT: Polymorphism; SIFT: Tolarated; PolyPhen-2: Probably damaging | NA         | Exon 3: c.107C>T (p.Thr36Met)       | Ward (2002) Nat Genet 30: 259 PubMed: 11919560 <sup>(9)</sup>      | (-)                                          | Pathogenic |
| PN2325 | Exon 34: c.5513A>G (p.Tyr1838Cys)   | Rossetti (2003) Kidney Int 64: 391 <sup>(2)</sup>                  | (-)                                                                                       | Pathogenic | Exon 34: c.5513A>G (p.Tyr1838Cys)   | Rossetti (2003) Kidney Int 64: 391 <sup>(2)</sup>                  | (-)                                          | Pathogenic |

\*Variations and predicted aminoacid changes have been named according to the guidelines of the Human Genome Variation Society using Mutalyzer software (<https://mutalyzer.nl>) of *PKHDI* (transcript # NM\_138694.4). Minor allele frequencies of those variations not previously reported are either less than 1% or not present in both The Genome Aggregation Database (gnomAD) (<https://gnomad.broadinstitute.org/>) and our in-house database comprising >100 exome data.

<sup>a</sup>ClinVar (<https://www.ncbi.nlm.nih.gov/clinvar>). MT, Mutation Taster (<http://www.mutationtaster.org>); PolyPhen2: Polymorphism Phenotyping v2 (<http://genetics.bwh.harvard.edu/pph2/index.shtml>); SIFT, Sorting Tolerant From Intolerant (<http://provean.jcvi.org/index.php>); HSF, Human Splicing Finder (<https://hsf.genomnis.com/home>) <sup>b</sup>RWTH Aachen database (<http://www.humgen.rwth-aachen.de/index.php>), NA, non-available, WT, wild-type

Supplementary Table 3: Demographic, clinical and laboratory Findings of patients with ADPKD

| Patient number             | Gender | Age at Diagnosis  | Consanguinity | Family History | Creatinine at diagnosis<br>(mg/dL) | eGFR at diagnosis<br>(ml/min/1.73 m²) | Creatinine at last visit<br>(mg/dL) | eGFR at last visit<br>(ml/min/1.73 m²) | USG Findings                                                       |
|----------------------------|--------|-------------------|---------------|----------------|------------------------------------|---------------------------------------|-------------------------------------|----------------------------------------|--------------------------------------------------------------------|
| PN1698                     | M      | 4 months          | -             | +              | 0.31                               | 66.8                                  | 0.32                                | 115.6                                  | Increased renal echogenicity, CM cysts                             |
| PN1608-III <sup>‡</sup>    | M      | 20 days           | -             | +              | 0.19                               | 125                                   | 0.2                                 | 216                                    | CM cysts, cysts in the liver, PF, dilated bile ducts               |
| PN1608-II2 <sup>‡</sup>    | M      | 5 months          | -             | +              | 0.58                               | 100                                   | 0.58                                | 105                                    | CM cysts                                                           |
| PN1582                     | F      | 4 years           | +             | +              | 0.36                               | 117                                   | 0.5                                 | 96                                     | CM cysts                                                           |
| PN1605                     | M      | 7.5 years         | -             | -              | 0.38                               | 136                                   | 0.53                                | 146                                    | Increased renal echogenicity, CM cysts                             |
| PN1571                     | M      | 2 years           | -             | +              | 0.31                               | 165                                   | 0.31                                | 165                                    | CM cysts                                                           |
| PN1519                     | F      | 11 years          | -             | +              | 0.43                               | 136                                   | 0.51                                | 127                                    | CM cysts                                                           |
| PN1613                     | F      | 6 years           | -             | +              | 0.53                               | 93.5                                  | 0.39                                | 133                                    | Cortical cysts                                                     |
| PN1533                     | M      | 3 months          | -             | +              | 0.3                                | 75                                    | 0.4                                 | 102                                    | Cortical cysts                                                     |
| PN1843-III1 <sup>‡</sup>   | M      | 16 years          | -             | +              | 0.57                               | 131                                   | 0.67                                | 112                                    | Cortical cysts                                                     |
| PN1843-II2 <sup>‡</sup>    | M      | 3 years 3 months  | -             | +              | 0.34                               | 132                                   | 0.45                                | 104                                    | Cortical cysts                                                     |
| PN1843-II3 <sup>‡</sup>    | F      | 9.5 years         | -             | +              | 0.38                               | 122.8                                 | 0.51                                | 113                                    | CM cysts                                                           |
| PN1822-III1 <sup>‡</sup>   | F      | 6 years           | -             | +              | 0.4                                | 112.5                                 | 0.39                                | 145                                    | CM cysts                                                           |
| PN1822-II2 <sup>‡</sup>    | F      | 8 months          | -             | +              | 0.22                               | 104                                   | 0.37                                | 135                                    | Cortical cysts                                                     |
| PN1746                     | M      | 5 years 5 months  | +             | -              | 0.42                               | 128                                   | 0.45                                | 145                                    | Increased renal echogenicity, CM cysts, medullary nephrocalcinosis |
| PN1747                     | M      | 9 years 9 months  | +             | -              | 0.5                                | 66.3                                  | 0.6                                 | 86                                     | Increased renal echogenicity, CM cysts, medullary nephrocalcinosis |
| PN1652                     | F      | 5 years 9 months  | -             | +              | 0.32                               | 148.4                                 | 0.4                                 | 132                                    | Renal cysts                                                        |
| PN1794                     | F      | 4 years 9 months  | -             | +              | 0.3                                | 150                                   | 0.38                                | 134.7                                  | Increased renal echogenicity, CM cysts                             |
| PN1590-III1 <sup>**‡</sup> | F      | 1.5 months        | +             | +              | 0.9                                | 27.5                                  | 0.58                                | 70.4                                   | Increased renal echogenicity, CM cysts                             |
| PN1590-II2 <sup>‡</sup>    | M      | 10 years 1 month  | +             | +              | 0.5                                | 113.9                                 | 0.47                                | 121                                    | Renal cysts                                                        |
| PN1821 <sup>†</sup>        | M      | 2 years 5 months  | +             | +              | 4.6                                | 9.4                                   | 0.9                                 | 77                                     | Increased renal echogenicity, CM cysts                             |
| PN1872                     | M      | 9 years           | -             | -              | 0.6                                | 87.4                                  | 0.65                                | 85                                     | Increased renal echogenicity, CM cysts                             |
| PN1878                     | F      | 12 years 8 months | -             | +              | 0.54                               | 118.5                                 | 0.66                                | 102                                    | Cortical cysts, splenomegaly                                       |
| PN1889                     | F      | 9 months          | -             | +              | 0.43                               | 122                                   | 0.65                                | 82.6                                   | Cortical cysts                                                     |

|                         |   |                   |   |   |      |       |      |       |                                                          |
|-------------------------|---|-------------------|---|---|------|-------|------|-------|----------------------------------------------------------|
| PN2124                  | M | 5 years 6 months  | - | + | 0.37 | 129   | 0.46 | 129   | Cortical cysts                                           |
| PN1711                  | F | 2.5 months        | - | + | 0.26 | 90.5  | 0.45 | 102   | Increased renal echogenicity, cortical cysts             |
| PN1724                  | F | 5 months          | + | + | 0.5  | 54    | 0.43 | 88.3  | Increased renal echogenicity, cortical cysts             |
| PN1743                  | F | 7 years           | - | - | 0.2  | 249   | 0.45 | 132   | CM cysts                                                 |
| PN1915                  | M | 5 years           | - | + | 0.32 | 160   | 0.27 | 203   | Medullar cysts, multiple cysts in the liver              |
| PN1922                  | M | 3 years 2 months  | - | + | 0.27 | 151.4 | 0.35 | 123.9 | Cortical cysts                                           |
| PN2131                  | F | 6 years 10 months | + | + | 0.35 | 139.2 | 0.32 | 152   | CM cysts                                                 |
| PN2086                  | M | 8 years           | - | - | 0.38 | 152   | 0.51 | 136   | CM cysts                                                 |
| PN2064                  | F | 3 years 2 months  | - | + | 0.22 | 187   | 0.19 | 230   | CM cysts                                                 |
| PN2042                  | F | 3 years 11 months | - | + | 0.3  | 166   | 0.57 | 102   | Cortical cysts                                           |
| PN2201                  | F | 2.5 months        | - | - | 1.00 | 19    | 0.78 | 52    | Increased renal echogenicity, cortical cysts             |
| PN2222                  | M | 12 years 3 months | - | + | 0.6  | 117   | 0.79 | 90    | CM cysts, splenomegaly                                   |
| PN2216                  | M | 5 years 4 months  | - | - | 0.42 | 101   | 0.34 | 151   | Cortical cysts                                           |
| PN2142                  | F | 8 months          | - | + | 0.39 | 85    | 0.2  | 154   | Increased renal echogenicity, CM cysts                   |
| PN2283                  | F | 14 years          | - | + | 0.79 | 85    | 0.56 | 122   | Increased renal echogenicity, CM cysts                   |
| PN1991*                 | F | 2 months          | + | + | 0.2  | 117.7 | 0.3  | 101   | Increased renal echogenicity, medullar cysts             |
| PN1980                  | F | 2 years           | - | + | 0.28 | 140   | 0.41 | 151   | Increased renal echogenicity, cortical cysts             |
| PN2336                  | F | 4 years 7 months  | + | + | 0.52 | 98.4  | 0.63 | 97.6  | Increased renal echogenicity, CM cysts                   |
| PN1668                  | F | 10 months         | - | - | 0.38 | 73.9  | 0.27 | 113   | Increased renal echogenicity, CM cysts                   |
| PN1583                  | M | 6 years           | - | + | 0.41 | 117   | 0.55 | 108   | Increased renal echogenicity, medullary nephrocalcinosis |
| PN1824                  | F | 8 years 2 months  | - | + | 0.36 | 153   | 0.69 | 98    | CM cysts                                                 |
| PN2269-III <sup>‡</sup> | F | 10 years 5 months | - | + | 0.45 | 126   | 0.61 | 102   | Increased renal echogenicity, medullary cysts            |
| PN2269-II2 <sup>‡</sup> | F | 15 years 4 months | - | + | 0.60 | 110   | 0.71 | 93    | Medullar cysts, splenomegaly                             |
| PN2270                  | F | 15 years          | - | + | 0.68 | 151   | 0.66 | 99    | Increased renal echogenicity, cortical cysts             |

CM, corticomedullary; F, female; M, male; PF, periportal fibrosis. \*Patient with a homozygous variation in *PKD1* <sup>†</sup>: Patient with the renal transplantation

<sup>‡</sup>: PN1608 III1 and II2; PN1843 III1, II2 and II3; PN1822 III1 and II2; PN1590 III1 and II2; PN2269 III1 and II2 are siblings.

Supplementary Table 4: Genetic characteristics of the patients with ADPKD

| Family-Patient number    | <i>PKDI</i> variant (predicted aminoacid change) <sup>a</sup> | Reference                                                              | ClinVar <sup>c</sup> or <i>In silico</i> prediction for previously unpublished variations                  | Mayo PKDB database <sup>d</sup> |
|--------------------------|---------------------------------------------------------------|------------------------------------------------------------------------|------------------------------------------------------------------------------------------------------------|---------------------------------|
| PN1698-III1              | Exon 46: c.12682C>T (p.Arg4228*)                              | Peral (1996) Am J Hum Genet 58: 86 <sup>(11)</sup>                     | (-)                                                                                                        | Pathogenic                      |
| PN1608-III1              | Exon 23: c.8311G>A (p.Glu2771Lys)                             | Rossetti (2001) Am J Hum Genet 68: 46 <sup>(12)</sup>                  | (-)                                                                                                        | Likely pathogenic               |
| PN1608-II2               | Exon 23: c.8311G>A (p.Glu2771Lys)                             | Rossetti (2001) Am J Hum Genet 68: 46 PubMed: 11115377 <sup>(12)</sup> | (-)                                                                                                        | Likely pathogenic               |
| PN1582-III1              | Exon 23: c.8614del (p.Ile2872Serfs*3)                         | Yu (2011) BMC Med Genet 12, 164 <sup>(13)</sup>                        | (-)                                                                                                        | Pathogenic                      |
| PN1605-III1              | Exon 29 c.9914_9915delCT (p.Ser3305fs*84)                     | Neumann (2013) Nephrol Dial Transplant 28: 1472 <sup>(14)</sup>        | (-)                                                                                                        | Pathogenic                      |
| PN1571-III1              | Exon 5: c.679C>T (p.Gln227*)                                  | Rossetti (2001) Am J Hum Genet 68: 46 <sup>(12)</sup>                  | (-)                                                                                                        | Pathogenic                      |
| PN1519-III1              | Exon 42: c.11563_11564delAC<br>(p.Thr3855AlafsTer105)         | rs1555445585                                                           | ClinVar: Pathogenic                                                                                        | NA                              |
| PN1613-III1              | Exon 9: c.1839_1842delCAGC (p.Ser614fs*170)                   | Novel                                                                  | MT: Disease causing                                                                                        | NA                              |
| PN1533-III1              | Exon 15: c.5099_5101delCCA (p.Thr1700del)                     | Novel                                                                  | MT: Disease causing                                                                                        | NA                              |
| PN1843-III1              | Exon 43: c.11935C>T (p.Gln3979*)                              | Hoefele (2010) Nephrol Dial Transplant 26: 2181 <sup>(15)</sup>        | (-)                                                                                                        | Pathogenic                      |
| PN1843-II2               | Exon 43: c.11935C>T (p.Gln3979*)                              | Hoefele (2010) Nephrol Dial Transplant 26: 2181 <sup>(15)</sup>        | (-)                                                                                                        | Pathogenic                      |
| PN1843-III3              | Exon 43: c.11935C>T (p.Gln3979*)                              | Hoefele (2010) Nephrol Dial Transplant 26: 2181 <sup>(15)</sup>        | (-)                                                                                                        | Pathogenic                      |
| PN1822-III1              | Exon 23: c.8614del (p.(Ile2872Serfs*3)                        | Yu (2011) BMC Med Genet 12, 164 <sup>(13)</sup>                        | (-)                                                                                                        | Pathogenic                      |
| PN1822-II2               | Exon 23: c.8614del (p.(Ile2872Serfs*3)                        | Yu (2011) BMC Med Genet 12, 164 <sup>(13)</sup>                        | (-)                                                                                                        | Pathogenic                      |
| PN1746-III1              | Exon 23: c.8464G>A (p.Val2822Met)                             | Hwang (2016) J Am Soc Nephrol 27: 1861 <sup>(16)</sup>                 | (-)                                                                                                        | VUS                             |
| PN1747-III1              | Exon10: c.1910C>T (p.Ala637Val)                               | rs1324355778                                                           | ClinVar: Not reported<br>MT: Polymorphism<br>SIFT: Tolarated<br>PolyPhen2: Benign<br>MAF: 0 (ALFA, gnomAD) | Likely benign                   |
| PN1652-III1              | Exon 15: c.4551C>G (p.Tyr1517*)                               | Audrézet (2012) Hum Mutat 33: 1239 <sup>(17)</sup>                     | (-)                                                                                                        | Pathogenic                      |
| PN1794-III1              | Exon 15: c.5860A>T (p.Asn1954Tyr)                             | Novel                                                                  | ClinVar: Not reported<br>MT: Disease causing<br>SIFT:Damaging<br>PolyPhen2: Probably damaging              | NA                              |
| PN1590-III1 <sup>b</sup> | Exon 30: c.10033C>T (p.Arg3345Trp) (homozygous)               | rs986431548                                                            | ClinVar: Not reported<br>MT: Disease causing<br>SIFT: Damaging<br>PolyPhen2: Probably damaging             | NA                              |
| PN1590-II2               | Exon 30: c.10033C>T (p.Arg3345Trp)                            | rs986431548                                                            | ClinVar: Not reported<br>MT: Disease causing                                                               | NA                              |

|            |                                              |                                                                        |                                                                                                                                       |                   |
|------------|----------------------------------------------|------------------------------------------------------------------------|---------------------------------------------------------------------------------------------------------------------------------------|-------------------|
|            |                                              |                                                                        | SIFT: Damaging<br>PolyPhen2: Probably damaging                                                                                        |                   |
| PN1821-II1 | Exon10: c.1910C>T (p.Ala637Val)              | rs1324355778                                                           | ClinVar: Not reported<br>MT: Polymorphism;<br>SIFT: Tolarated;<br>PolyPhen2: Benign<br>MAF: 0 (ALFA, gnomAD)                          | Likely benign     |
| PN1872-II1 | Exon18: c.7418G>A (p.Gyl2473Glu)             | Novel                                                                  | ClinVar: Not reported<br>MT: Disease causing<br>SIFT: Deleterious<br>PolyPhen-2: Probably damaging                                    | NA                |
| PN1878-II1 | Exon23: c.8447_8448insA (p.Ala2817fs*5)      | Novel                                                                  | ClinVar: Not reported<br>MT: Disease causing<br>MAF: Not reported (ALFA, gnomAD)                                                      | NA                |
| PN1889-II1 | c.10618+2T>C (splice site)                   | Audrézet (2012) Hum Mutat 33: 1239 <sup>(17)</sup>                     | (-)                                                                                                                                   | Pathogenic        |
| PN2124-II1 | Exon 37: c.10842delC (p.Phe3615fs*17)        | Novel                                                                  | ClinVar: Not reported<br>MT: Disease causing<br>MAF: Not reported (ALFA, gnomAD)                                                      | NA                |
| PN1711-II1 | Exon 12 c.2896C>T (p.Arg966Trp)              | Laleye (2012) Genet Couns 23: 435 <sup>(18)</sup>                      | (-)                                                                                                                                   | NA                |
| PN1724-II1 | Exon 15: c.4639C>T (p.Arg1547Cys)            | rs1487713442                                                           | ClinVar: Not reported<br>MT: Disease causing<br>SIFT:Damaging<br>PolyPhen-2: Probably damaging<br>MAF: 0 (ALFA), 0.000008 (gnomAD)    | NA                |
| PN1743-II1 | Exon 15: c.3451dupC (p.Leu1151fs*60)         | Novel                                                                  | ClinVar: Not reported<br>MT: Disease causing<br>MAF: Not reported (ALFA, gnomAD)                                                      | NA                |
| PN1915-II1 | Exon 44: c.12010C>T(p.Gln4004*)              | Gao (2006) Zhonghua Yi Xue Yi Chuan Xue Za Zhi 23: 23 <sup>(19)</sup>  | (-)                                                                                                                                   | Pathogenic        |
| PN1922-II1 | Exon 15: c.5014_5015delAG (p.Arg1672fs*98)   | rs1555455457                                                           | ClinVar: Pathogenic                                                                                                                   | Pathogenic        |
| PN2131-II1 | Exon 38: c.11082C>A (p.Cys3694*)             | Mizoguchi (2001) J Hum Genet 46: 511 PubMed: 11558899 <sup>(20)</sup>  | (-)                                                                                                                                   | Pathogenic        |
| PN2086-II1 | Exon 46: c.12910T>A (p.*4304Lys) (stop loss) | Novel                                                                  | ClinVar: Not reported<br>MT: Polymorphism<br>MAF: Not reported (ALFA, gnomAD)                                                         | NA                |
| PN2064-II1 | Exon 23: c.8311G>A (p.Glu2771Lys)            | Rossetti (2001) Am J Hum Genet 68: 46 PubMed: 11115377 <sup>(12)</sup> | (-)                                                                                                                                   | Likely pathogenic |
| PN2042-II1 | Exon 15: c.5995G>A (p.Gly1999Ser)            | Rossetti (2007) J Am Soc Nephrol 18: 2143 <sup>(21)</sup>              | (-)                                                                                                                                   | Likely pathogenic |
| PN2201-II1 | Exon 18: c.7418G>A (p.Gly2473Glu)            | Novel                                                                  | ClinVar: Not reported<br>MT: Disease causing<br>SIFT: Deleterious<br>PolyPhen2: Probably damaging<br>MAF: Not reported (ALFA, gnomAD) | NA                |
| PN2222-II1 | Exon 15: c.4306C>T (p.Arg1436*)              | Garcia-Gonzalez (2007) Mol Genet Metab 92: 160 <sup>(22)</sup>         | (-)                                                                                                                                   | Pathogenic        |
| PN2216-II1 | Exon 29: c.9895T>A (p.Tyr3299Asn)            | Novel                                                                  | ClinVar: Not reported<br>MT: Disease causing<br>SIFT: Damaging                                                                        | NA                |

|                               |                                                               |                                                                            |                                                                                                                                          |                   |
|-------------------------------|---------------------------------------------------------------|----------------------------------------------------------------------------|------------------------------------------------------------------------------------------------------------------------------------------|-------------------|
|                               |                                                               |                                                                            | PolyPhen2: Probably damaging<br>MAF: Not reported (ALFA, gnomAD)                                                                         |                   |
| <b>PN2142-II1</b>             | Exon 24: c.8914G>A (p.Asp2972Asn)                             | rs150189496                                                                | ClinVar: Not reported<br>MT: Disease causing<br>SIFT: Damaging<br>PolyPhen2: Probably damaging<br>MAF: 0.00045 (ALFA), 0.000104 (gnomAD) | Likely benign     |
| <b>PN2283-II1</b>             | Exon 37: c.11000T>C (p.Leu3667Pro)                            | Novel                                                                      | ClinVar: Not reported<br>MT: Disease causing<br>SIFT: Damaging<br>PolyPhen-2: Probably damaging<br>MAF: Not reported (ALFA, gnomAD)      | NA                |
| <b>PN1991-II1<sup>b</sup></b> | Exon 20: c.7852G>A (p.Val2618Met) (homozygous)                | rs376969316                                                                | ClinVar: Not reported<br>MT: Disease causing<br>SIFT: Damaging<br>PolyPhen2: Probably damaging<br>MAF: 0.00009 (ALFA), 0.000043 (gnomAD) | NA                |
| <b>PN1980-II1</b>             | Exon 15: c.5014_5015delA G (p.Arg1672fs*98)                   | Watnick (1999) Am J Hum Genet 65: 1561 <sup>(23)</sup>                     | (-)                                                                                                                                      | Pathogenic        |
| <b>PN2336-II1</b>             | Exon 39: c.11258G>A (p.Arg3753Gln)                            | Rossetti (2007) J Am Soc Nephrol 18: 2143 PubMed: 17582161 <sup>(21)</sup> | (-)                                                                                                                                      | Likely pathogenic |
|                               | <i>PKD2</i> variant (predicted aminoacid change) <sup>a</sup> |                                                                            |                                                                                                                                          |                   |
| <b>PN1668-II1</b>             | Exon 8: c.1859G>T (p.Gly620Val)                               | Novel                                                                      | ClinVar: Not reported<br>MT: Disease causing<br>SIFT: Damaging<br>PolyPhen-2: Probably damaging<br>MAF: Not reported (ALFA, gnomAD)      | NA                |
| <b>PN1583-II1</b>             | Exon6: c.1445T>G (p.Phe482Cys)                                | Dedoussis (2008) Eur J Clin Invest 38: 180 <sup>(24)</sup>                 | (-)                                                                                                                                      | Likely benign     |
| <b>PN1824-II1</b>             | Exon 6: c.1445T>G (p.Phe482Cys)                               | Dedoussis (2008) Eur J Clin Invest 38: 180 <sup>(24)</sup>                 | (-)                                                                                                                                      | Likely benign     |
| <b>PN2269-II1</b>             | Exon 5: c.1281_1282delAG (p.Tyr429fs*5)                       | Novel                                                                      | ClinVar: Not reported<br>MT: Disease causing<br>MAF: Not reported (ALFA, gnomAD)                                                         | NA                |
| <b>PN2269-II2</b>             | Exon 5: c.1281_1282 delAG (p.Tyr429fs*5)                      | Novel                                                                      | ClinVar: Not reported<br>MT: Disease causing<br>MAF: Not reported (ALFA, gnomAD)                                                         | NA                |
| <b>PN2270-II1</b>             | Exon 6: c.1372C>T (p.Gln458*)                                 | Novel                                                                      | ClinVar: Not reported<br>MT: Disease causing<br>MAF: Not reported (ALFA, gnomAD)                                                         | NA                |

<sup>a</sup>Variations and predicted aminoacid changes have been named according to the guidelines of the Human Genome Variation Society using Mutalyzer software (<https://mutalyzer.nl>) of *PKD1* (transcript # NM\_001009944.3) or *PKD2* (transcript # NM\_000297.4). All but PN1590-II1 and PN1991 are heterozygous. <sup>b</sup>Homozygous *PKD1* variation. Patients with the same family number represent siblings.

<sup>c</sup> ClinVar (<https://www.ncbi.nlm.nih.gov/clinvar>). <sup>d</sup><https://pkdb.mayo.edu/variants>  
MAF, minor allele frequency MT, Mutation Taster (<http://www.mutationtaster.org>); PolyPhen2, Polymorphism Phenotyping v2 (<http://genetics.bwh.harvard.edu/pph2/index.shtml>); SIFT, Sorting Tolerant From Intolerant (<http://provean.jcvi.org/index.php>)  
ALFA, Allele Frequency Aggregation (<https://www.ncbi.nlm.nih.gov/snp/docs/gsr/alfa>), gnomAD, The Genome Aggregation Database (<https://gnomad.broadinstitute.org>); NA, non-available; VUS, Variant of Uncertain Significance (VUS)

**Supplementary Table 5:** 3-Year and 6-Year renal survival according to clinical and genetic features in the entire study cohort

|                           | <b>Patient number<br/>(n)</b> | <b>3 year RS*<br/>% (SE)</b> | <b>6 year RS*<br/>% (SE)</b> | <b>p value</b>                       |
|---------------------------|-------------------------------|------------------------------|------------------------------|--------------------------------------|
| <b>Variant</b>            |                               |                              |                              |                                      |
| <b>PKHD1</b>              | n=21                          | 51.6 (11.1)                  | 32.8 (11.2)                  | 0.001                                |
| <b>PKD1</b>               | n=42                          | 83.8 (6.2)                   | 74.5 (10.4)                  | (PKHD1-PKD1: 0.001                   |
| <b>PKD2</b>               | n=6                           | 100 (-)                      | 100 (-)                      | PKD1-PKD2: 0.28<br>PKHD1-PKD2: 0.02) |
| <b>Diagnosis</b>          |                               |                              |                              |                                      |
| <b>ADPKD</b>              | n=48                          | 86.2 (5.3)                   | 77.6 (9.5)                   | 0.001                                |
| <b>ARPKD</b>              | n=21                          | 51.6 (11.2)                  | 32.8 (11.1)                  |                                      |
| <b>Gender</b>             |                               |                              |                              |                                      |
| <b>Female</b>             | n=38                          | 69.4 (7.8)                   | 64.1 (8.8)                   | 0.72                                 |
| <b>Male</b>               | n=31                          | 82.3 (7.4)                   | 52.6 (15.2)                  |                                      |
| <b>Hypertension</b>       |                               |                              |                              |                                      |
| <b>Yes</b>                | n=22                          | 61.5 (10.8)                  | 26.9 (12.5)                  | 0.002                                |
| <b>No</b>                 | n=47                          | 81.8 (5.9)                   | 81.8 (5.9)                   |                                      |
| <b>Growth retardation</b> |                               |                              |                              |                                      |
| <b>Yes</b>                | n=12                          | 50 (14.4)                    | 16.7 (14.4)                  | 0.001                                |
| <b>No</b>                 | n=57                          | 80.4 (5.7)                   | 71.5 (7.8)                   |                                      |
| <b>Malnutrition</b>       |                               |                              |                              |                                      |
| <b>Yes</b>                | n=19                          | 40.9 (11.5)                  | 0 (0)                        | 0.0001                               |

|                               |      |             |             |      |
|-------------------------------|------|-------------|-------------|------|
| <b>No</b>                     | n=50 | 88.8 (4.8)  | 79.4 (7.6)  |      |
| <b>USG renal echogenicity</b> |      |             |             |      |
| <b>Normal</b>                 | n=28 | 95.5 (4.4)  | 76.4 (17.4) | 0.04 |
| <b>Increased</b>              | n=32 | 64.3 (14.6) | 64.3 (14.6) |      |

\*GFR<90 ml/dk/1.73 m<sup>2</sup> (RS: Renal survival, SE: Standart error, USG: Ultrasonography)

**Supplementary Table 6:** 3-Year and 6-Year renal survival according to clinical and genetic features in patients with ARPKD

|                           | <b>Patient number<br/>(n)</b> | <b>3 year RS*<br/>% (SE)</b> | <b>6 year RS*<br/>% (SE)</b> | <b>p value</b> |
|---------------------------|-------------------------------|------------------------------|------------------------------|----------------|
| <b>Age at diagnosis</b>   |                               |                              |                              |                |
| <1                        | n=13                          | 50 (14.4)                    | 33.3 (16.7)                  | 0.62           |
| ≥1                        | n=8                           | 55.6 (16.6)                  | 33.3 (15.7)                  |                |
| <b>Gender</b>             |                               |                              |                              |                |
| Female                    | n=10                          | 30 (14.5)                    | 20 (12.6)                    | 0.046          |
| Male                      | n=11                          | 71.6 (14)                    | 47.7 (16.6)                  |                |
| <b>Hypertension</b>       |                               |                              |                              |                |
| Yes                       | n=13                          | 44 (14.3)                    | 17.6 (11.2)                  | 0.15           |
| No                        | n=8                           | 62.5 (11.1)                  | 62.5 (11.1)                  |                |
| <b>Growth retardation</b> |                               |                              |                              |                |
| Yes                       | n=7                           | 28.6 (17.1)                  | 0 (0)                        | 0.01           |
| No                        | n=14                          | 64.3 (12.8)                  | 45.9 (14.3)                  |                |
| <b>Malnutrition</b>       |                               |                              |                              |                |
| Yes                       | n=11                          | 27.3 (13.4)                  | 13.6 (11.7)                  | 0.03           |
| No                        | n=10                          | 78.8 (13.4)                  | 52.5 (17.6)                  |                |

|                                |      |             |             |                   |
|--------------------------------|------|-------------|-------------|-------------------|
| <b>USG renal echogenicity</b>  |      |             |             |                   |
| <b>Normal</b>                  | n=4  | 100 (-)     | 100 (-)     | 0.019             |
| <b>Increased</b>               | n=17 | 43.8 (12.4) | 18.2 (11)   |                   |
| <b>Phenotypic presentation</b> |      |             |             |                   |
| <b>Renal</b>                   | n=10 | 50 (15.8)   | 40 (15.5)   | 0.85              |
| <b>Renal+Liver</b>             | n=11 | 53 (15.5)   | 19.9 (16.3) |                   |
| <b><i>PKHD1</i> variant</b>    |      |             |             |                   |
| <b>Exon 1-15</b>               | n=5  | 40 (21.9)   | 0 (0)       | 0.42 <sup>†</sup> |
| <b>Exon 16-30</b>              | n=2  | 50 (35.4)   | 50 (35.4)   |                   |
| <b>Exon 31-45</b>              | n=11 | 54.5 (15)   | 34.1 (15)   |                   |
| <b>Exon 46-67</b>              | n=12 | 64.8 (14.3) | 43.2 (15.7) |                   |
| <b>Variant type</b>            |      |             |             |                   |
| <b>Homozygous</b>              | n=6  | 0 (0)       | 0 (0)       | 0.0001            |
| <b>Compound heterozygous</b>   | n=15 | 72.2 (11.9) | 45.9 (14.4) |                   |
| <b>Variant function</b>        |      |             |             |                   |
| <b>T+</b>                      | n=3  | 0 (0)       | 0 (0)       | 0.017**           |
| <b>T-</b>                      | n=11 | 36.4 (14.5) | 36.4 (14.5) |                   |
| <b>T+ and T-</b>               | n=7  | 100 (-)     | 50 (20.4)   |                   |

(SE: Standard error, T+: Truncating mutation, T-: Non-truncating mutation)

\*: eGFR<90 ml/min/1.73 m<sup>2</sup>    †: p = 0.42 for Exon 1-15 and 16-30, p = 0.25 for Exon 1-15 and 31-45, p = 0.08 for Exon 1-15 and 46-67, p=0.76 for Exon 16-30 and 31-45, p=0.91 for Exon 16-30 and Exon 46-67, p=0.75 for Exon 31-45 and 46-67.

\*\* : p = 0.103 for T + with T-, p = 0.003 for T + with T + and T-, p = 0.08 for T- with T + and T-

**Supplementary Table 7:** 3-Year and 6-Year renal survival according to clinical and genetic features in patients with ADPKD

|                               | <b>Patient number<br/>(n)</b> | <b>3-year RS*<br/>% (SE)</b> | <b>6-year RS*<br/>% (SE)</b> | <b>p value</b> |
|-------------------------------|-------------------------------|------------------------------|------------------------------|----------------|
| <b>Age at diagnosis</b>       |                               |                              |                              |                |
| <2                            | n=13                          | 59 (17)                      | 59 (17)                      | 0.04           |
| ≥2                            | n=35                          | 94 (3.9)                     | 83 (11)                      |                |
| <b>Gender</b>                 |                               |                              |                              |                |
| Female                        | n=28                          | 84.1 (7.4)                   | 84.1 (7.4)                   | 0.75           |
| Male                          | n=20                          | 90 (6.7)                     | 45 (32)                      |                |
| <b>Hypertension</b>           |                               |                              |                              |                |
| Yes                           | n=9                           | 88.9 (10.5)                  | 44.4 (31.9)                  | 0.49           |
| No                            | n=39                          | 85.5 (6.1)                   | 85.5 (6.1)                   |                |
| <b>Growth retardation</b>     |                               |                              |                              |                |
| Yes                           | n=5                           | 80 (17.9)                    | 40 (29.7)                    | 0.15           |
| No                            | n=43                          | 86.8 (5.6)                   | 86.8 (5.6)                   |                |
| <b>Malnutrition</b>           |                               |                              |                              |                |
| Yes                           | n=8                           | 60 (18.2)                    | 0 (0)                        | 0.002          |
| No                            | n=40                          | 92 (4.4)                     | 92 (4.4)                     |                |
| <b>USG renal echogenicity</b> |                               |                              |                              |                |
| Normal                        | n=34                          | 95.5 (4.4)                   | 76.4 (17.4)                  | 0.04           |
| Increased                     | n=12                          | 64.3 (14.6)                  | 64.3 (14.6)                  |                |

|                                |      |             |             |                   |
|--------------------------------|------|-------------|-------------|-------------------|
| <b>PKD1 variant</b>            |      |             |             |                   |
| <b>Exon 1-15</b>               | n=14 | 83.6 (10.8) | 62.7 (19.8) | 0.73 <sup>†</sup> |
| <b>Exon 16-30</b>              | n=16 | 81.3 (9.8)  | 81.3 (9.8)  |                   |
| <b>Exon 31-46</b>              | n=12 | 88.9 (10.5) | 88.9 (10.5) |                   |
| <b>Variant function (PKD1)</b> |      |             |             |                   |
| <b>T+</b>                      | n=23 | 94.4 (5.4)  | 94.4 (5.4)  | 0.03              |
| <b>T-</b>                      | n=19 | 71.1 (11.3) | 59.2 (14.3) |                   |
| <b>Variant function (PKD2)</b> |      |             |             |                   |
| <b>T+</b>                      | n=3  | 100 (-)     | -           |                   |
| <b>T-</b>                      | n=3  | 100 (-)     | -           |                   |

(SE: Standard error, T+: Truncating mutation, T-: Non-truncating mutation)

\*: eGFR<90 ml/min/1.73 m<sup>2</sup> †: PKD1 p=0.95 for exon 1-15 and 16-30, p=0.59 for exon 1-15 and 31-46, p=0.54 for exon 16-30 and 31-46.

**Supplementary Table 8:** Comparison of Clinical and Laboratory Findings by Variant Function in PKHD1

|                           | <b>T+</b><br>(n=3) | <b>T-</b><br>(n=11) | <b>T+ and T-</b><br>(n=7) | <b>p value</b> |
|---------------------------|--------------------|---------------------|---------------------------|----------------|
| <b>Diagnosis age</b>      |                    |                     |                           |                |
| <1 year                   | 3 (100)            | 7 (63.6)            | 3 (42.9)                  | 0.058          |
| ≥1 year                   | 0 (0)              | 4 (36.4)            | 4 (57.1)                  |                |
| <b>Growth retardation</b> | 2 (66.7)           | 3 (27.3)            | 2 (28.6)                  | 0.41           |
| <b>Malnutrition</b>       | 3 (100)            | 6 (54.5)            | 2 (28.6)                  | 0.11           |
| <b>eGFR at diagnosis</b>  | 19.5 ± 12          | 73.6 ± 34.9         | 88.6 ± 48.9               | 0.055          |
| <b>Follow-up eGFR</b>     | 5.2 ± 4.3          | 75.3 ± 18.3         | 94.7 ± 34.3               | 0.02           |

(T+: Truncating mutation, T-: Non-truncating mutation)

## References Supplementary Data

1. Melchionda S, Palladino T, Castellana S, Giordano M, Benetti E, De Bonis P, et al. Expanding the mutation spectrum in 130 probands with ARPKD: identification of 62 novel PKHD1 mutations by sanger sequencing and MLPA analysis. *Journal of human genetics*. 2016;61(9):811-21.
2. Rossetti S, Torra R, Coto E, Consugar M, Kubly V, Málaga S, et al. A complete mutation screen of PKHD1 in autosomal-recessive polycystic kidney disease (ARPKD) pedigrees. *Kidney international*. 2003;64(2):391-403.
3. Furu L, Onuchic LF, Gharavi A, Hou X, Esquivel EL, Nagasawa Y, et al. Milder presentation of recessive polycystic kidney disease requires presence of amino acid substitution mutations. *Journal of the American Society of Nephrology : JASN*. 2003;14(8):2004-14.
4. Onuchic LF, Furu L, Nagasawa Y, Hou X, Eggermann T, Ren Z, et al. PKHD1, the polycystic kidney and hepatic disease 1 gene, encodes a novel large protein containing multiple immunoglobulin-like plexin-transcription-factor domains and parallel beta-helix 1 repeats. *American journal of human genetics*. 2002;70(5):1305-17.
5. Bergmann C, Senderek J, Windelen E, Küpper F, Middeldorf I, Schneider F, et al. Clinical consequences of PKHD1 mutations in 164 patients with autosomal-recessive polycystic kidney disease (ARPKD). *Kidney international*. 2005;67(3):829-48.
6. Gunay-Aygun M, Tuchman M, Font-Montgomery E, Lukose L, Edwards H, Garcia A, et al. PKHD1 sequence variations in 78 children and adults with autosomal recessive polycystic kidney disease and congenital hepatic fibrosis. *Molecular genetics and metabolism*. 2010;99(2):160-73.
7. Liang N, Jiang X, Zeng L, Li Z, Liang D, Wu L. 28 novel mutations identified from 33 Chinese patients with cilia-related kidney disorders *Clim Chim Acta* 2020; 501: 207-215.
8. Denamur E, Delezoide AL, Alberti C, Bourillon A, Gubler MC, Bouvier R, et al. Genotype-phenotype correlations in fetuses and neonates with autosomal recessive polycystic kidney disease. *Kidney international*. 2010;77(4):350-8.
9. Ward CJ, Hogan MC, Rossetti S, Walker D, Sneddon T, Wang X, et al. The gene mutated in autosomal recessive polycystic kidney disease encodes a large, receptor-like protein. *Nature genetics*. 2002;30(3):259-69.
10. Brinkert F, Lehnhardt A, Montoya C, Helmke K, Schaefer H, Fischer L, et al. Combined liver-kidney transplantation for children with autosomal recessive polycystic kidney disease (ARPKD): indication and outcome. *Transplant international : official journal of the European Society for Organ Transplantation*. 2013;26(6):640-50.
11. Peral B, San Millán JL, Ong AC, Gamble V, Ward CJ, Strong C, et al. Screening the 3' region of the polycystic kidney disease 1 (PKD1) gene reveals six novel mutations. *American journal of human genetics*. 1996;58(1):86-96.
12. Rossetti S, Strmecki L, Gamble V, Burton S, Sneddon V, Peral B, et al. Mutation analysis of the entire PKD1 gene: genetic and diagnostic implications. *American journal of human genetics*. 2001;68(1):46-63.
13. Yu C, Yang Y, Zou L, Hu Z, Li J, Liu Y, et al. Identification of novel mutations in Chinese Hans with autosomal dominant polycystic kidney disease. *BMC medical genetics*. 2011;12:164.

14. Neumann HP, Jilg C, Bacher J, Nabulsi Z, Malinoc A, Hummel B, et al. Epidemiology of autosomal-dominant polycystic kidney disease: an in-depth clinical study for south-western Germany. *Nephrology, dialysis, transplantation : official publication of the European Dialysis and Transplant Association - European Renal Association*. 2013;28(6):1472-87.
15. Hoefele J, Mayer K, Scholz M, Klein HG. Novel PKD1 and PKD2 mutations in autosomal dominant polycystic kidney disease (ADPKD). *Nephrology, dialysis, transplantation : official publication of the European Dialysis and Transplant Association - European Renal Association*. 2011;26(7):2181-8.
16. Hwang YH, Conklin J, Chan W, Roslin NM, Liu J, He N, et al. Refining Genotype-Phenotype Correlation in Autosomal Dominant Polycystic Kidney Disease. *Journal of the American Society of Nephrology : JASN*. 2016;27(6):1861-8.
17. Audrézet MP, Cornec-Le Gall E, Chen JM, Redon S, Quéré I, Creff J, et al. Autosomal dominant polycystic kidney disease: comprehensive mutation analysis of PKD1 and PKD2 in 700 unrelated patients. *Human mutation*. 2012;33(8):1239-50.
18. Laleye A, Awede B, Agboton B, Azonbakin S, Biaou O, Sagbo G, et al. Autosomal dominant polycystic kidney disease in University Clinic of Nephrology and Haemodialysis of Cotonou: clinical and genetical findings. *Genetic counseling (Geneva, Switzerland)*. 2012;23(4):435-45.
19. Gao DX, Cao QW, Ding KJ, Zhao YR, Wang LC, Niu ZH, et al. [An analysis for the phenotype and genotype of autosomal dominant polycystic kidney disease from two Chinese families]. *Zhonghua yi xue yi chuan xue za zhi = Zhonghua yixue yichuanxue zazhi = Chinese journal of medical genetics*. 2006;23(1):23-6.
20. Mizoguchi M, Tamura T, Yamaki A, Higashihara E, Shimizu Y. Mutations of the PKD1 gene among Japanese autosomal dominant polycystic kidney disease patients, including one heterozygous mutation identified in members of the same family. *Journal of human genetics*. 2001;46(9):511-7.
21. Rossetti S, Consugar MB, Chapman AB, Torres VE, Guay-Woodford LM, Grantham JJ, et al. Comprehensive molecular diagnostics in autosomal dominant polycystic kidney disease. *Journal of the American Society of Nephrology : JASN*. 2007;18(7):2143-60.
22. Garcia-Gonzalez MA, Jones JG, Allen SK, Palatucci CM, Batish SD, Seltzer WK, et al. Evaluating the clinical utility of a molecular genetic test for polycystic kidney disease. *Molecular genetics and metabolism*. 2007;92(1-2):160-7.
23. Watnick T, Phakdeekitcharoen B, Johnson A, Gandolph M, Wang M, Briefel G, et al. Mutation detection of PKD1 identifies a novel mutation common to three families with aneurysms and/or very-early-onset disease. *American journal of human genetics*. 1999;65(6):1561-71.
24. Dedoussis GV, Luo Y, Starremans P, Rossetti S, Ramos AJ, Cantiello HF, et al. Co-inheritance of a PKD1 mutation and homozygous PKD2 variant: a potential modifier in autosomal dominant polycystic kidney disease. *European journal of clinical investigation*. 2008;38(3):180-90.
