# Supplementary material
Source: publisher figshare collection journal article supplement (https://karger.figshare.com/articles/dataset/_/21922554)

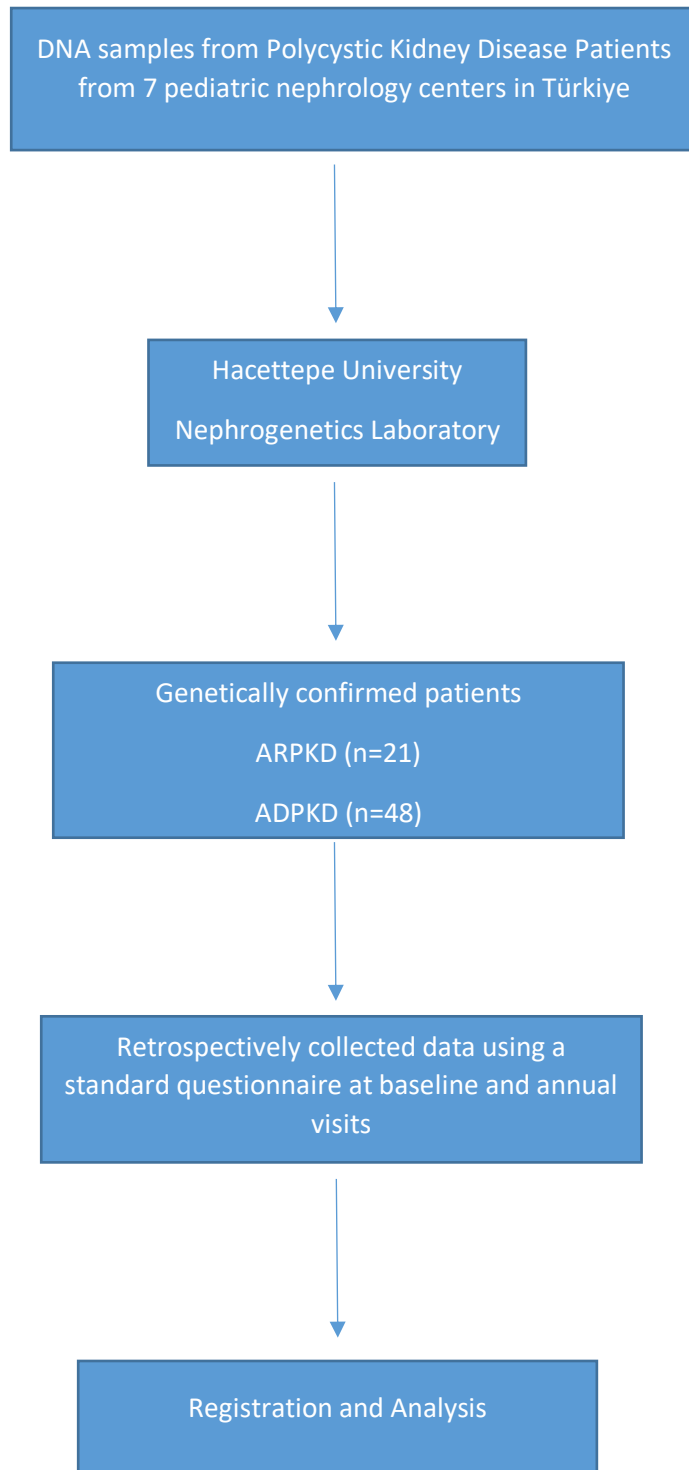

**Supplementary Figure 1.** Flow diagram of the study

Supplement: Supplementary file 1 [file 1]
